# Supplementary material for: The application of amine-based materials for carbon capture and utilisation: an overarching view
Source: Royal Society of Chemistry journal article supplement (doi:10.1039/d1ma00360g), 2021-01-01
Supplement: d1ma00360g1.pdf [file d1ma00360g1.pdf]

## The application of amine-based materials for carbon capture and utilisation: an overarching view

Louise B. Hamdy,<sup>\*a,b</sup> Chitrakshi Goel,<sup>a</sup> Jennifer A. Rudd,<sup>a,c</sup> Andrew R. Barron,<sup>a,d,e</sup> Enrico Andreoli<sup>\*a</sup>

a. Energy Safety Research Institute, Swansea University, Bay Campus, Swansea, SA1 8EN, UK.

b. CGG, Tyn-y-Coed, Pentwyn Road, Llandudno, LL30 1SA, UK.

c. School of Management, Swansea University, Bay Campus, Swansea, SA1 8EN, UK.

d. Department of Chemistry and Department of Materials Science and Nanoengineering, Rice University, Houston, TX 77005, USA.

e. Faculty of Engineering, Universiti Teknologi Brunei, Brunei Darussalam.

\* Corresponding authors: [louise.hamdy@cgg.com](mailto:louise.hamdy@cgg.com) ; [e.andreoli@swansea.ac.uk](mailto:e.andreoli@swansea.ac.uk)

**Table S1.** Performance of various selected polyamine-based CO<sub>2</sub> adsorbents (under flue gas or air –relevant conditions).

| Adsorbent (class)                          | Amine (wt% / mmol N/g)                                  | Temp. / °C (des. gas) | CO <sub>2</sub> conc. <sup>a</sup> (humidity) | Total system pressure <sup>b</sup> | CO <sub>2</sub> capacity <sup>c</sup> / mmol/g | Method                         | No. cycles | Comments | Ref. |
|--------------------------------------------|---------------------------------------------------------|-----------------------|-----------------------------------------------|------------------------------------|------------------------------------------------|--------------------------------|------------|----------|------|
| <b>INORGANIC OXIDE-SUPPORTED</b>           |                                                         |                       |                                               |                                    |                                                |                                |            |          |      |
| 48% PEI/SBA-15                             | PEI (M <sub>w</sub> 1800)<br>48 wt%<br>(11.14 mmol N/g) | Ads: 30<br>Des: 120   | 400 ppm                                       | 1 atm                              | 1.10                                           | TGA                            |            |          | (1)  |
| 41% PEI/SBA-15                             | PEI (M <sub>w</sub> 1800)<br>48 wt%<br>(9.52 mmol N/g)  | Ads: 30<br>Des: 120   | 10%                                           | 1 atm                              | 1.23                                           | TGA                            |            |          | (1)  |
| 50% PPG/SBA-15 (1)                         | PPG (50 wt%)                                            | Ads: 30<br>Des: 120   | 400 ppm                                       | 1 atm                              | 0.63                                           | TGA                            |            |          | (1)  |
|                                            | PPG (50 wt%)                                            | Ads: 30<br>Des: 120   | 10%                                           | 1 atm                              | 1.12 – 0.49                                    | TGA                            | 5          |          | (1)  |
| EtSNTs-50<br>PEI encapsulated in nanotubes | PEI (M <sub>w</sub> 600)<br>(11.2 mmol N/g)             | Ads: 30<br>Des: 100   | 400 ppm                                       | 1 atm                              | ~ 1.00                                         | Fix bed Reactor (breakthrough) | 8          |          | (2)  |

Electronic Supplementary Information

|                                     |                                           |                                                                             |                                |          |                                                                                  |                                                         |      |                                                                                                                                                                             |     |
|-------------------------------------|-------------------------------------------|-----------------------------------------------------------------------------|--------------------------------|----------|----------------------------------------------------------------------------------|---------------------------------------------------------|------|-----------------------------------------------------------------------------------------------------------------------------------------------------------------------------|-----|
| 40% TPTA/SBA-15                     | TPTA<br>41 wt% organic<br>(8.71 mmol N/g) | Ads: 35<br>Des: 70                                                          | 400 ppm                        | 1 atm    | 3.15 mmol CO <sub>2</sub> /g<br>SiO <sub>2</sub><br><br>(1.86 mmol/g<br>sorbent) | TGA                                                     |      |                                                                                                                                                                             | (3) |
| SBA-15/PEI/PEG200                   | PEI (Mw 800)<br>(8.38 mmol N/g)           | Ads: 30<br>Des: 110                                                         | 400 ppm                        | 1 atm    | 1.64                                                                             | TGA                                                     |      |                                                                                                                                                                             | (4) |
| Templated Alumina/PEI/PEG200        | PEI (Mw 800)<br>(5.98 mmol N/g)           | Ads: 30<br>Des: 110                                                         | 400 ppm                        | 1 atm    | 1.29                                                                             | TGA                                                     |      |                                                                                                                                                                             | (4) |
| TRI-SBA-15-130-0.4<br>(2)           | TRI<br>(~30 wt% organic)                  | Ads: 25<br>Des: 120<br>(N <sub>2</sub> )                                    | 5%                             | 1 atm    | 1.88                                                                             | TGA                                                     |      |                                                                                                                                                                             | (5) |
|                                     |                                           | Ads: 25<br>Des: 120<br>(N <sub>2</sub> )                                    | 5%                             | 1 atm    | 1.78 – 1.82                                                                      | TGA                                                     | 12   |                                                                                                                                                                             | (5) |
| (PEI-25-APTES-25)-PQCS2129<br>(1/2) | PEI, APTES<br>(7.5 mmol N/g)              | Ads: 40<br>Des: 120<br>(N <sub>2</sub> )                                    | 0.04 bar                       | 0.81 bar | 2.70                                                                             | Perkin–Elmer<br>Pyris 1 TGA                             |      | N <sub>2</sub> to balance pressure during adsorption.<br><br>Isosteric heat of adsorption at CO <sub>2</sub> uptake of 2.6 mmol/g calculated as 56 kJ/mol CO <sub>2</sub> . | (6) |
|                                     |                                           | Ads: 60<br>Des: 105<br>(He)<br>Regen:105<br>(He, 90 vol % H <sub>2</sub> O) | 10%<br>(8 vol %)               | 1.01 bar | 2.43 ± 0.26                                                                      | Fixed-bed flow system<br>(breakthrough)                 | 8    | Regeneration under highly humidified He stream.                                                                                                                             | (6) |
| PEI / TMPED / silica<br>(1/2)       | PEI, TMPED                                | Ads: 50<br>Des: 175<br>(He/ N <sub>2</sub> , 4% v/v H <sub>2</sub> O)       | 13.4%<br>(4% v/v)              | 1 atm    | 1.80 – 2.00                                                                      | Fixed bed reactor                                       | >100 |                                                                                                                                                                             | (7) |
| FS-PEI-50<br>(1)                    | PEI (M <sub>w</sub> 25,000)<br>(50 wt %)  | Ads: 25<br>Des: 85<br>(0.9 x10 <sup>-3</sup> bar)<br>Regen:(air)            | Ambient air<br>(410 – 420 ppm) | 10.3 bar | 1.65 – 1.71                                                                      | All-glass,<br>grease-free flow system<br>(Breakthrough) | 4    | “Air from the laboratory atmosphere was dried filtered and compressed to 150 psi and used directly for the                                                                  | (8) |

Electronic Supplementary Information

|                                 |                                                                        |                                                   |                                            |          |      |                                           |  |                                                                                                                |      |
|---------------------------------|------------------------------------------------------------------------|---------------------------------------------------|--------------------------------------------|----------|------|-------------------------------------------|--|----------------------------------------------------------------------------------------------------------------|------|
|                                 |                                                                        |                                                   |                                            |          |      |                                           |  | adsorption measurements''                                                                                      |      |
|                                 |                                                                        | Ads: 25<br>Des: 85<br>( $0.9 \times 10^{-3}$ bar) | Ambient air<br>(410 – 420 ppm<br>(RH 67%)  | 10.3 bar | 1.41 |                                           |  |                                                                                                                | (8)  |
| FS-PEI-33<br>(1)                | PEI ( $M_w$ 25000)<br>(33 wt %)                                        | Ads: 25<br>Des: 85 ( $0.9 \times 10^{-3}$ bar)    | Ambient air<br>(410 – 420 ppm)<br>(RH 67%) | 10.3 bar | 1.74 |                                           |  |                                                                                                                | (8)  |
| PEHAS13 – MCF<br>support<br>(3) | PEI/aziridine<br>(4.49 mmol N/g)                                       | Ads: 75<br>Des: 110<br>(Ar)                       | 10%<br>(100% water saturation)             | 1 atm    | 0.85 | packed bed flow reactor<br>(Breakthrough) |  | Adsorption experiments were ended when the uptake rates became less than $0.2 \mu\text{mol CO}_2/\text{min}$ . | (9)  |
| S-70C-2-24h<br>(3)              | PEI/aziridine<br>(7.23 mmol N/g)<br><br>SBA-15<br>Mesoporous Silica    | Ads: 25<br>Des: 110                               | 10%                                        | 1 atm    | 0.93 | TGA                                       |  |                                                                                                                | (10) |
| SynA50<br>(1)                   | PEI ( $M_w$ 800)<br>(11.20 mmol N/g)<br><br>$\gamma$ -alumina          | Ads: 25<br>Des: 110<br>(in Ar)                    | 400 ppm                                    | 1 atm    | 1.74 | TGA                                       |  |                                                                                                                | (11) |
|                                 |                                                                        | Ads: 25<br>Des: 110<br>(in Ar)                    | 10%                                        | 1 atm    | 1.95 | TGA                                       |  |                                                                                                                |      |
| SynA40<br>(1)                   | PEI ( $M_w$ 800)<br>(8.66 mmol n/g)<br><br>$\gamma$ -alumina           | Ads: 25<br>Des: 110<br>(in Ar)                    | 400 ppm                                    | 1 atm    | 1.33 | TGA                                       |  |                                                                                                                | (11) |
|                                 |                                                                        | Ads: 25<br>Des: 110<br>(in Ar)                    | 10%                                        | 1 atm    | 1.73 | TGA                                       |  |                                                                                                                |      |
| MS40<br>(1)                     | PEI ( $M_w$ 800)<br>(9.23 mmol N/g)<br><br>Mesoporous silica<br>SBA-15 | Ads: 25<br>Des: 110<br>(in Ar)                    | 400 ppm                                    | 1 atm    | 1.05 | TGA                                       |  |                                                                                                                | (11) |

Electronic Supplementary Information

|                               |                                                                              |                                |                     |       |              |                                       |   |                                                                                                                                                 |      |
|-------------------------------|------------------------------------------------------------------------------|--------------------------------|---------------------|-------|--------------|---------------------------------------|---|-------------------------------------------------------------------------------------------------------------------------------------------------|------|
|                               |                                                                              | Ads: 25<br>Des: 110<br>(in Ar) | 10%                 | 1 atm | 1.61         | TGA                                   |   |                                                                                                                                                 |      |
| PEI_H-SiO <sub>2</sub><br>(1) | PEI (M <sub>w</sub> 800)<br>2.62 g PEI/g<br>sorbent                          | Ads: 30<br>Des: 110<br>(He)    | 400 ppm<br>(19% RH) | 1 atm | 3.36 – ~ 2.8 | Fixed bed<br>system<br>(breakthrough) | 5 | The breakthrough<br>measurement continued<br>until the effluent CO <sub>2</sub><br>concentration reached<br>99 % of that of the feed<br>stream. | (12) |
|                               |                                                                              | Ads: 30<br>Des: 110<br>(He)    | 400 ppm             | 1 atm | ~ 2.34       | Fixed bed<br>system<br>(breakthrough) | 5 |                                                                                                                                                 |      |
|                               |                                                                              | Ads: 50<br>Des: 110<br>(He)    | 400 ppm             | 1 atm | 2.60         | TGA                                   |   |                                                                                                                                                 |      |
|                               |                                                                              | Ads: 80<br>Des: 110<br>(He)    | 10 %                | 1 atm | 4.10         | TGA                                   |   |                                                                                                                                                 |      |
| PEI/Silica<br>(1)             | PEI (M <sub>w</sub> 800)<br>(10.5 mmol N/g)                                  | Ads: 25<br>Des: 110            | 400 ppm             | 1 atm | 2.36 – 1.65  | TGA                                   | 4 |                                                                                                                                                 | (13) |
| A-PEI/Silica<br>(1/2)         | PEI (M <sub>w</sub> 800),<br>APTES<br>(10.7 mmol N/g)                        | Ads: 25<br>Des: 110            | 400 ppm             | 1 atm | 2.26 – 2.05  | TGA                                   | 4 |                                                                                                                                                 | (13) |
| T-PEI/Silica<br>(1)           | PEI (M <sub>w</sub> 800),<br>tetrapropyl<br>orthotitanate<br>(10.5 mmol N/g) | Ads: 25<br>Des: 110            | 400 ppm             | 1 atm | 2.19 – 2.16  | TGA                                   | 4 |                                                                                                                                                 | (13) |
| PAA_MCM_41<br>(1)             | PAA (M <sub>n</sub> 1130 Da)<br>(7.24 mmol N/g)                              | Ads: 25<br>Des: 120<br>(Ar)    | 400 ppm             | 1 atm | 0.86         | TGA                                   |   |                                                                                                                                                 | (14) |
|                               |                                                                              | Ads: 25<br>Des: 120<br>(Ar)    | 10%                 | 1 atm | ~ 1.50       | TGA                                   | 3 |                                                                                                                                                 |      |

Electronic Supplementary Information

|                                  |                                                                        |                                       |                   |       |                                                |                                               |    |                                                                        |      |
|----------------------------------|------------------------------------------------------------------------|---------------------------------------|-------------------|-------|------------------------------------------------|-----------------------------------------------|----|------------------------------------------------------------------------|------|
| PEHA-PO-1-2/50S (1)              | PEHA (59.5 wt% organic)<br><br>1:2 molar ratio of PEHA/propylene oxide | Ads: 25<br>Des: 60 (N <sub>2</sub> )  | 400 ppm           | 1 atm | ~ 1.25                                         | TGA                                           | 15 |                                                                        | (15) |
| TEPA-PO-1-2/50S (1)              | TEPA (61.0 wt% organic)<br><br>1:2 molar ratio TEPA/propylene oxide    | Ads: 25<br>Des: 60 (N <sub>2</sub> )  | 400 ppm           | 1 atm | ~ 1.34                                         | TGA                                           | 15 |                                                                        | (15) |
| <b>OTHER SUPPORTED</b>           |                                                                        |                                       |                   |       |                                                |                                               |    |                                                                        |      |
| F-C-PSI, 10% PEI                 | PEI (M <sub>w</sub> 800 Da) (5.2 mmol N/g fibre)                       | Ads: 37<br>Des: 110 (N <sub>2</sub> ) | 10 mol% (100% RH) | 1 atm | 1.25 mmol/g fibre                              | Simulated flue gas flow system (breakthrough) |    | Capacity /g fibre                                                      | (16) |
| PAI/silica/PEI fibres            | PEI (M <sub>w</sub> 800) (5.9 mmol N/g fibre)                          | Ads: 35<br>Des: 90 (N <sub>2</sub> )  | 14 mol% (100% RH) | 1 atm | 0.85 mmol/g fibre (b)<br>1.19 mmol/g fibre (q) | Simulated flue gas flow system (breakthrough) |    | Capacity /g fibre                                                      | (17) |
|                                  |                                                                        | Ads: 35<br>Des: 120 (He)              | 10%               | 1 atm | 1.02 – 0.83 mmol/g fibre                       | TGA                                           | 5  | Capacity /g fibre                                                      |      |
| PAI/silica/PEI fibres + glycerol | PEI (M <sub>w</sub> 800) (5.9 mmol N/g fibre)                          | Ads: 35<br>Des: 90 (N <sub>2</sub> )  | 14 mol% (100% RH) | 1 atm | 1.3 mmol/g fibre (b)<br>2.0 mmol/g fibre (q)   | Simulated flue gas flow system (breakthrough) |    | Capacity /g fibre                                                      | (17) |
| PEI-CA-SiO <sub>2</sub>          | PEI (M <sub>w</sub> 800 Da) 0.7 g PEI/g SiO <sub>2</sub>               | Ads: 35<br>Des: 90 (N <sub>2</sub> )  | 380 ppm           | 1 atm | 0.62 mmol/g fibre (b) @ 95% of C0              | Column breakthrough                           |    | Demonstrated vacuum-assisted desorption in TSA                         | (18) |
|                                  |                                                                        | Ads: 35<br>Des: 110 (He)              | 395 ppm           | 1 atm | ~0.62 mmol/g fibre                             | TGA                                           | 11 | ~95% of the CO <sub>2</sub> capacity was retained at the end of cycles |      |

Electronic Supplementary Information

|                                                            |                                         |                                              |                 |            |             |                                                                                        |    |                                              |      |
|------------------------------------------------------------|-----------------------------------------|----------------------------------------------|-----------------|------------|-------------|----------------------------------------------------------------------------------------|----|----------------------------------------------|------|
| PG-R20:1<br>PEI/glass<br>fiber matrix +<br>epichlorohydrin | PEI                                     | Ads: 30<br>Des: 80<br>(vacuum)               | 16%             | 1 atm      | 0.26        | Agilent 6820<br>gas<br>chromatogram<br>adsorption/desorption process<br>(Breakthrough) |    |                                              | (19) |
|                                                            |                                         | Ads: 30<br>Des: 80<br>(vacuum)               | 16%<br>(80% RH) | 1 atm      | 3.98        | (Breakthrough)                                                                         |    |                                              |      |
| PEI/G-silica sheets                                        | PEI (M <sub>n</sub> 600)                | Ads: 75<br>Des: 120                          | 15%             | 1 bar      | 3.89        | magnetic<br>suspension<br>microbalance<br>operated in a<br>closed system               | 20 |                                              | (20) |
| exfGO-D x<br>7.0TETA                                       | TETA<br>(7 g TETA/g<br>sample = 88 wt%) | Ads: 75<br>Des: 70                           | 100%            | 0.15 bar   | 7.5         | Quantachrome<br>Autosorb-iQC.                                                          |    |                                              | (21) |
| exfGO-D x<br>6.0TEPA                                       | TETA<br>(6 g/g sample = 86<br>wt%)      | Ads: 75<br>Des: 100<br>(N <sub>2</sub> )     | 15%             | 1 bar      | 6.4 – 5.0   | TGA                                                                                    | 50 |                                              | (21) |
| HP20/PEI-50                                                | PEI<br>(50 wt %)                        | Ads: 25<br>Des: 100<br>(N <sub>2</sub> )     | 400 ppm         | 1 atm      | 2.26 – 2.22 | U-shaped glass<br>tube                                                                 | 5  |                                              | (22) |
|                                                            |                                         | Ads: 75<br>Des: 100<br>(N <sub>2</sub> )     | 15 %            | 1 atm      | 2.95 – 2.91 | TGA                                                                                    | 5  |                                              |      |
| PEI/PIM-1<br>composite                                     | PEI (M <sub>w</sub> 800)<br>(21 wt %)   | Ads: 35<br>Des: 110<br>(vacuum < 5<br>mTorr) | 100%            | 0.0004 bar | 0.23        | Micromeritics<br>ASAP 2020                                                             |    |                                              | (23) |
|                                                            |                                         | Ads: 35<br>Des: 110<br>(vacuum < 5<br>mTorr) | 100%            | 0.1 bar    | 1.15        | Micromeritics<br>ASAP 2020                                                             |    |                                              |      |
|                                                            |                                         | Ads: 35<br>Des: 110                          | 10%             | 1 atm      | ~0.9        | TGA                                                                                    | 10 | Lost ~ 10% uptake<br>capacity over 10 cycles |      |

Electronic Supplementary Information

|                                             |                                         |                                                                       |                                               |          |                                                                                             |                                                                                                                                        |     |                                                                                                                                                                             |      |
|---------------------------------------------|-----------------------------------------|-----------------------------------------------------------------------|-----------------------------------------------|----------|---------------------------------------------------------------------------------------------|----------------------------------------------------------------------------------------------------------------------------------------|-----|-----------------------------------------------------------------------------------------------------------------------------------------------------------------------------|------|
|                                             |                                         | (N <sub>2</sub> )                                                     |                                               |          |                                                                                             |                                                                                                                                        |     |                                                                                                                                                                             |      |
| A-PEI-300                                   | PEI (M <sub>w</sub> 300)                | Ads: 25<br>Des: 110<br>(vacuum)                                       | 100%                                          | 0.15 bar | 3.60                                                                                        | Volumetric<br>(PCTpro-E&E)                                                                                                             |     | Selectivity measurement showed no N <sub>2</sub> adsorption. IAST measured: from 12 - 45 kJmol/g between ~ 0.5 - 3.0 mmol CO <sub>2</sub> /g                                | (24) |
| 35 wt% PEI/3 wt% (Zn)ZIF-8/SiO <sub>2</sub> | PEI (M <sub>w</sub> 800)<br>35 wt%      | Ads: 50<br>Des: 120<br>(5.6 v/v%<br>H <sub>2</sub> O/N <sub>2</sub> ) | 15%<br>(5.6 v/v %)                            | 1 atm    | 2.84 (50th cycle)<br>(deactivation of 8%<br>between 10 - 250th<br>cycle)                    | Packed Bed<br>Reactor                                                                                                                  | 250 | Adsorption gas included 4.5% O <sub>2</sub><br><br>Stability to SO <sub>2</sub> , NO <sub>x</sub><br>and H <sub>2</sub> S measured                                          | (25) |
| AEAPDMS-NFC                                 | AEAPDMS-NFC<br>(5.9 mmol N/g)           | Ads: 30<br>Des: 90<br>(30 mbar)                                       | 400–530 ppm<br>(60% RH)                       | 1 atm    | (average ads<br>capacity)<br>0.90<br><br>reduction in<br>adsorption capacity<br>by up to 5% | Packed bed                                                                                                                             | 100 | TVS cycles, reduction<br>of adsorption capacity<br>by up to 5%.                                                                                                             | (26) |
| PP-AM-HBP-NH <sub>2</sub>                   | PEHA<br>(6.39 mmol N/g)                 | Ads: 25<br>Des: 90 (N <sub>2</sub> )                                  | 10% volume                                    | 1 atm    | 5.60 ± 0.1                                                                                  | Breakthrough                                                                                                                           | 15  | Sample pre-swollen in<br>water at 25 °C. Swelling<br>degree was 81.69%.                                                                                                     | (27) |
| <b>UNSUPPORTED</b>                          |                                         |                                                                       |                                               |          |                                                                                             |                                                                                                                                        |     |                                                                                                                                                                             |      |
| PEI-C60                                     | PEI (M <sub>w</sub> 25,000)<br>(75 wt%) | Ads: 90<br>Des: 90<br>(vacuum)                                        | 100%                                          | 0.15 bar | 3.41                                                                                        | Setaram<br>PCTPro<br>volumetric<br>apparatus,<br>(single<br>component)                                                                 |     | High CO <sub>2</sub> /N <sub>2</sub> and<br>CO <sub>2</sub> /CH <sub>4</sub> selectivity<br>demonstrated.<br><br>Cycles showed 60%<br>starting capacity after<br>100 cycles | (28) |
| PEI HB–4.0% EPC                             | PEI                                     | Ads:<br>ambient<br>Des: 160<br>(air)                                  | 15%                                           | ~ 2 bar  | ~1.37                                                                                       | CO <sub>2</sub> filled<br>balloon<br>equipped with<br>needle inserted<br>into screw-cap<br>septum seal of<br>vial containing<br>sample | 10  | Water weight ratio of<br>sample 70%<br><br>Sample also regenerated<br>in microwave                                                                                          | (29) |
| 1-G0/600PEI                                 | PEI (M <sub>w</sub> 600)                | Ads: 25<br>Des: 120<br>(He)                                           | 60 mL/min<br>CO <sub>2</sub> /30<br>mL/min He | 1 atm    | 0.93                                                                                        | TGA                                                                                                                                    |     | Heat of adsorption 103<br>kJ mol/g at low<br>adsorption values.                                                                                                             | (30) |

Electronic Supplementary Information

|           |                                                |                                                |                                               |         |                   |                                      |     |                                                      |      |
|-----------|------------------------------------------------|------------------------------------------------|-----------------------------------------------|---------|-------------------|--------------------------------------|-----|------------------------------------------------------|------|
|           |                                                |                                                |                                               |         |                   |                                      |     | Measured on Micromeritics ASAP-2020 apparatus        |      |
|           |                                                | Ads: 65<br>Des: 120<br>(humid N <sub>2</sub> ) | 15%<br>(5.7 vol% H <sub>2</sub> O)            | 1 atm   | 2.98<br>(average) | Packed bed reactor<br>(breakthrough) | 350 | Simulated flue gas contained 4.5 vol% O <sub>2</sub> |      |
| 1-G0-TEPA | TEPA<br>(14 wt% N)                             | Ads: 25<br>Des: 120<br>(He)                    | 60 mL/min<br>CO <sub>2</sub> /30<br>mL/min He | 1 atm   | 2.02              | TGA                                  |     |                                                      | (31) |
|           |                                                | Ads: 65<br>Des: 120<br>(humid N <sub>2</sub> ) | 15%<br>(5.7 vol% H <sub>2</sub> O)            | 1 atm   | 1.68<br>(average) | Packed bed reactor<br>(breakthrough) | 25  | Simulated flue gas contained 4.5 vol% O <sub>2</sub> |      |
| BC40      | PEI (M <sub>w</sub> 25,000)<br>(5.79 mmol N/g) | Ads: 90<br>Des: 155<br>(100% CO <sub>2</sub> ) | 10%                                           | 1 atm   | 2.16 – 2.14       | TGA                                  | 29  |                                                      | (32) |
|           |                                                | Ads: 90<br>Des: 110<br>(vacuum)                | 100%                                          | 0.1 bar | 2.29              | Isorb (Gas sorption analyzer)        |     |                                                      |      |
| E200-FZ   | PEI (M <sub>w</sub> 750,000)<br>(8.2 mmol N/g) | Ads: 25<br>Des: 110<br>(He)                    | 10%                                           | 1 atm   | 2.01              | TGA                                  |     |                                                      | (33) |
|           |                                                | Ads: 25<br>Des: 110<br>(N <sub>2</sub> )       | 10%<br>(65% RH)                               | 1 atm   | 3.36              | Breakthrough                         |     |                                                      |      |
| E200-LN2  | PEI (M <sub>w</sub> 750,000)<br>(8.8 mmol N/g) | Ads: 25<br>Des: 110<br>(He)                    | 10%                                           | 1 atm   | 2.81              | TGA                                  |     |                                                      | (33) |
|           |                                                | Ads: 25<br>Des: 110<br>(N <sub>2</sub> )       | 10%<br>(65% RH)                               | 1 atm   | 5.50              | Breakthrough                         |     |                                                      |      |



<sup>a</sup> If total pressure 1 atm, balance is inert gas Ar, He or N<sub>2</sub>

<sup>b</sup> Total pressure assumed 1 atm unless otherwise stated for TGA and breakthrough

<sup>c</sup> Maximum adsorption capacity reported/equilibrium capacity

(b) breakthrough capacity

(q) pseudo equilibrium capacity

PEI: Polyethylenimine

PPG: Poly(propylene guanidine)

PAA: Poly(allylamine)

TEPA: Tetraethylenepentamine

TETA: Triethylenetetramine

PEHA: Pentaethylenhexamine

TRI: 3-[2-(2-Aminoethylamino)ethylamino]propyl trimethoxysilane

APTES: 3-(aminopropyl)triethoxysilane

TMPEd: N<sup>1</sup>-(3-trimethoxysilylpropyl)diethylenediamine

AEAPDMS-NFC: N-(2-aminoethyl)-3-aminopropylmethyltrimethoxysilane nanofibrillated cellulose

## References

1. Park SJ, Lee JJ, Hoyt CB, Kumar DR, Jones CW. Silica supported poly(propylene guanidine) as a CO<sub>2</sub> sorbent in simulated flue gas and direct air capture. *Adsorption*. 2020;26(1):89-101.
2. Liu L, Chen J, Tao L, Li H, Yang Q. Aminopolymer Confined in Ethane-Silica Nanotubes for CO<sub>2</sub> Capture from Ambient Air. *ChemNanoMat*. 2020;6(7):1096-103.
3. Pang SH, Lee L-C, Sakwa-Novak MA, Lively RP, Jones CW. Design of Aminopolymer Structure to Enhance Performance and Stability of CO<sub>2</sub> Sorbents: Poly(propylenimine) vs Poly(ethylenimine). *Journal of the American Chemical Society*. 2017;139(10):3627-30.
4. Sakwa-Novak MA, Tan S, Jones CW. Role of Additives in Composite PEI/Oxide CO<sub>2</sub> Adsorbents: Enhancement in the Amine Efficiency of Supported PEI by PEG in CO<sub>2</sub> Capture from Simulated Ambient Air. *ACS Applied Materials & Interfaces*. 2015;7(44):24748-59.
5. Jahandar Lashaki M, Sayari A. CO<sub>2</sub> capture using triamine-grafted SBA-15: The impact of the support pore structure. *Chemical Engineering Journal*. 2018;334:1260-9.
6. Fauth DJ, Gray ML, Pennline HW, Krutka HM, Sjoström S, Ault AM. Investigation of Porous Silica Supported Mixed-Amine Sorbents for Post-Combustion CO<sub>2</sub> Capture. *Energy & Fuels*. 2012;26(4):2483-96.
7. Fisher II JC, Gray M. Cyclic Stability Testing of Aminated-Silica Solid Sorbent for Post-Combustion CO<sub>2</sub> Capture. *ChemSusChem*. 2015;8(3):452-5.
8. Goepfert A, Czaun M, May RB, Prakash GKS, Olah GA, Narayanan SR. Carbon Dioxide Capture from the Air Using a Polyamine Based Regenerable Solid Adsorbent. *Journal of the American Chemical Society*. 2011;133(50):20164-7.
9. Drese JH, Choi S, Didas SA, Bollini P, Gray ML, Jones CW. Effect of support structure on CO<sub>2</sub> adsorption properties of pore-expanded hyperbranched aminosilicas. *Microporous and Mesoporous Materials*. 2012;151:231-40.
10. Chaikittisilp W, Didas SA, Kim H-J, Jones CW. Vapor-Phase Transport as A Novel Route to Hyperbranched Polyamine-Oxide Hybrid Materials. *Chemistry of Materials*. 2013;25(4):613-22.
11. Chaikittisilp W, Kim H-J, Jones CW. Mesoporous Alumina-Supported Amines as Potential Steam-Stable Adsorbents for Capturing CO<sub>2</sub> from Simulated Flue Gas and Ambient Air. *Energy & Fuels*. 2011;25(11):5528-37.
12. Kwon HT, Sakwa-Novak MA, Pang SH, Sujan AR, Ping EW, Jones CW. Aminopolymer-Impregnated Hierarchical Silica Structures: Unexpected Equivalent CO<sub>2</sub> Uptake under Simulated Air Capture and Flue Gas Capture Conditions. *Chemistry of Materials*. 2019;31(14):5229-37.
13. Choi S, Gray M, Jones C. Amine-Tethered Solid Adsorbents Coupling High Adsorption Capacity and Regenerability for CO<sub>2</sub> Capture From Ambient Air. *ChemSusChem*. 2011;4:628-35.

14. Chaikittisilp W, Khunsupat R, Chen TT, Jones CW. Poly(allylamine)–Mesoporous Silica Composite Materials for CO<sub>2</sub> Capture from Simulated Flue Gas or Ambient Air. *Industrial & Engineering Chemistry Research*. 2011;50(24):14203-10.
15. Goepfert A, Zhang H, Sen R, Dang H, Prakash GKS. Oxidation-Resistant, Cost-Effective Epoxide-Modified Polyamine Adsorbents for CO<sub>2</sub> Capture from Various Sources Including Air. *ChemSusChem*. 2019;12(8):1712-23.
16. Labreche Y, Lively RP, Rezaei F, Chen G, Jones CW, Koros WJ. Post-spinning infusion of poly(ethyleneimine) into polymer/silica hollow fiber sorbents for carbon dioxide capture. *Chemical Engineering Journal*. 2013;221:166-75.
17. Labreche Y, Fan Y, Rezaei F, Lively RP, Jones CW, Koros WJ. Poly(amide-imide)/Silica Supported PEI Hollow Fiber Sorbents for Postcombustion CO<sub>2</sub> Capture by RTSA. *ACS Applied Materials & Interfaces*. 2014;6(21):19336-46.
18. Sujan AR, Pang SH, Zhu G, Jones CW, Lively RP. Direct CO<sub>2</sub> Capture from Air using Poly(ethylenimine)-Loaded Polymer/Silica Fiber Sorbents. *ACS Sustainable Chemistry & Engineering*. 2019;7(5):5264-73.
19. Li P, Ge B, Zhang S, Chen S, Zhang Q, Zhao Y. CO<sub>2</sub> Capture by Polyethylenimine-Modified Fibrous Adsorbent. *Langmuir*. 2008;24(13):6567-74.
20. Yang S, Zhan L, Xu X, Wang Y, Ling L, Feng X. Graphene-Based Porous Silica Sheets Impregnated with Polyethyleneimine for Superior CO<sub>2</sub> Capture. *Advanced Materials*. 2013;25(15):2130-4.
21. Gadipelli S, Lu Y, Skipper NT, Yildirim T, Guo Z. Design of hyperporous graphene networks and their application in solid-amine based carbon capture systems. *Journal of Materials Chemistry A*. 2017;5(34):17833-40.
22. Chen Z, Deng S, Wei H, Wang B, Huang J, Yu G. Polyethylenimine-Impregnated Resin for High CO<sub>2</sub> Adsorption: An Efficient Adsorbent for CO<sub>2</sub> Capture from Simulated Flue Gas and Ambient Air. *ACS Applied Materials & Interfaces*. 2013;5(15):6937-45.
23. Pang SH, Jue ML, Leisen J, Jones CW, Lively RP. PIM-1 as a Solution-Processable “Molecular Basket” for CO<sub>2</sub> Capture from Dilute Sources. *ACS Macro Letters*. 2015;4(12):1415-9.
24. Lin Y, Lin H, Wang H, Suo Y, Li B, Kong C, et al. Enhanced selective CO<sub>2</sub> adsorption on polyamine/MIL-101(Cr) composites. *Journal of Materials Chemistry A*. 2014;2(35):14658-65.
25. Luz I, Soukri M, Lail M. Flying MOFs: polyamine-containing fluidized MOF/SiO<sub>2</sub> hybrid materials for CO<sub>2</sub> capture from post-combustion flue gas. *Chemical Science*. 2018;9(20):4589-99.
26. Gebald C, Wurzbacher JA, Tingaut P, Steinfeld A. Stability of Amine-Functionalized Cellulose during Temperature-Vacuum-Swing Cycling for CO<sub>2</sub> Capture from Air. *Environmental Science & Technology*. 2013;47(17):10063-70.
27. He H, Hu Y, Chen S, Zhuang L, Ma B, Wu Q. Preparation and Properties of A Hyperbranch-Structured Polyamine adsorbent for Carbon Dioxide Capture. *Scientific Reports*. 2017;7(1):3913.
28. Andreoli E, Dillon EP, Cullum L, Alemany LB, Barron AR. Cross-Linking Amine-Rich Compounds into High Performing Selective CO<sub>2</sub> Absorbents. 2014;4:7304.
29. Xu X, Pejdic B, Heath C, Wood CD. Carbon capture with polyethylenimine hydrogel beads (PEI HBs). *Journal of Materials Chemistry A*. 2018;6(43):21468-74.
30. Thompson SJ, Soukri M, Lail M. Phosphorous dendrimer bound polyethyleneimine as solid sorbents for post-combustion CO<sub>2</sub> capture. *Chemical Engineering Journal*. 2018;350:1056-65.
31. Thompson SJ, Soukri M, Lail M. Phosphorus Dendrimer Derived Solid Sorbents for CO<sub>2</sub> Capture from Post-Combustion Gas Streams. *Energy & Fuels*. 2018;32(8):8658-67.
32. Hamdy LB, Wakeham RJ, Taddei M, Barron AR, Andreoli E. Epoxy Cross-Linked Polyamine CO<sub>2</sub> Sorbents Enhanced via Hydrophobic Functionalization. *Chemistry of Materials*. 2019;31(13):4673-84.
33. Yoo C-J, Narayanan P, Jones CW. Self-supported branched poly(ethyleneimine) materials for CO<sub>2</sub> adsorption from simulated flue gas. *Journal of Materials Chemistry A*. 2019;7(33):19513-21.
